# Supplementary material for: Gollop–Wolfgang Complex Is Associated with a Monoallelic Variation in WNT11
Source: MDPI journal article supplement (doi:10.3390/genes15010129), 2024-01-20
Supplement: s1 [file s1]

## Supplementary figures

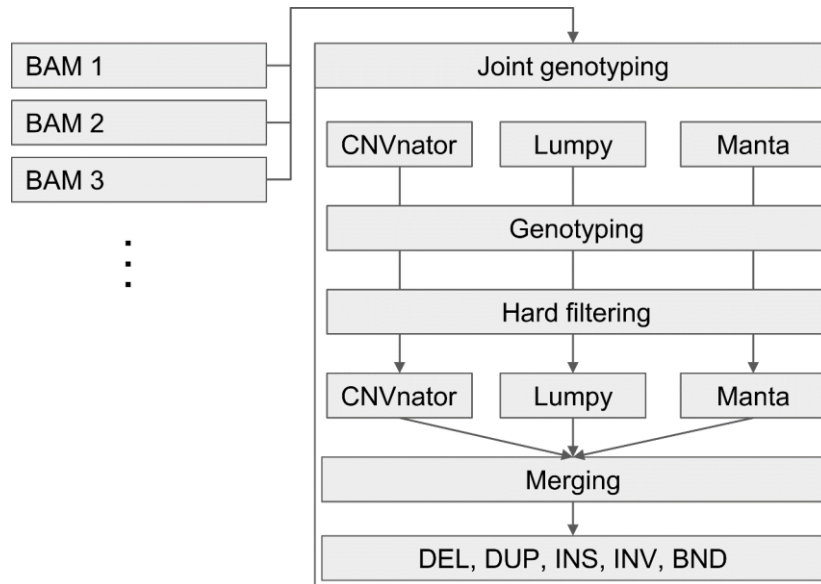

Supplementary figure 1. Structural variants detection pipeline

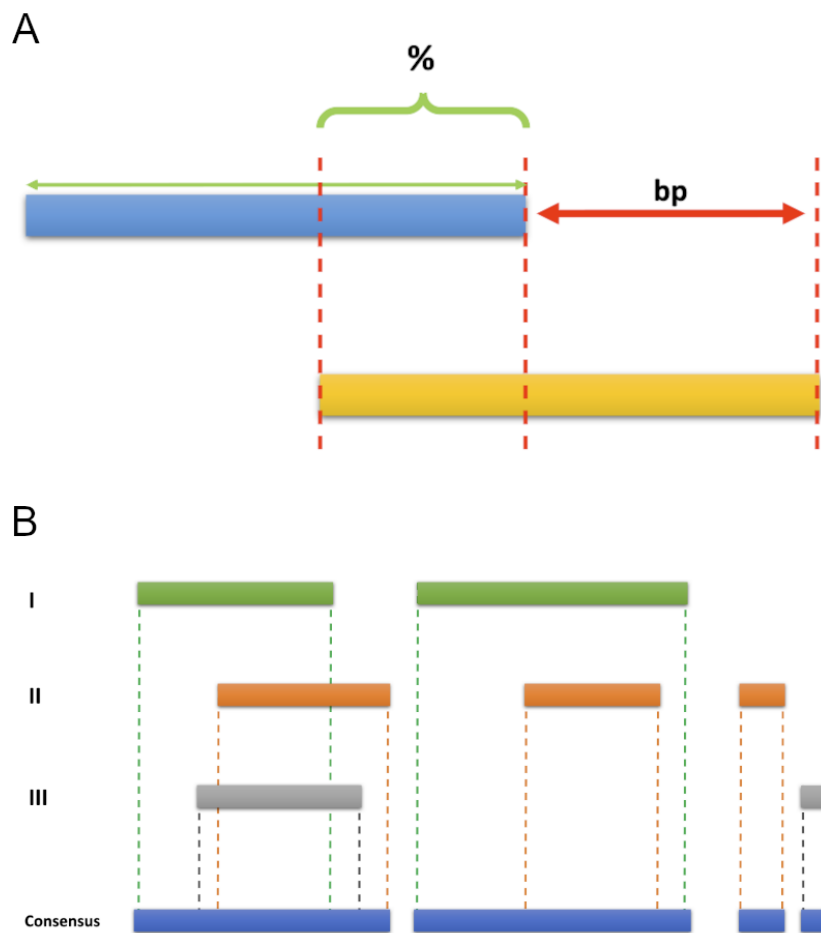

Supplementary figure 2. Visual representation of (A) merging two genomic intervals by % overlap and bp distance between two furthest break ends. (B) providing consensus region, based on 50% overlap and 1000 bp.

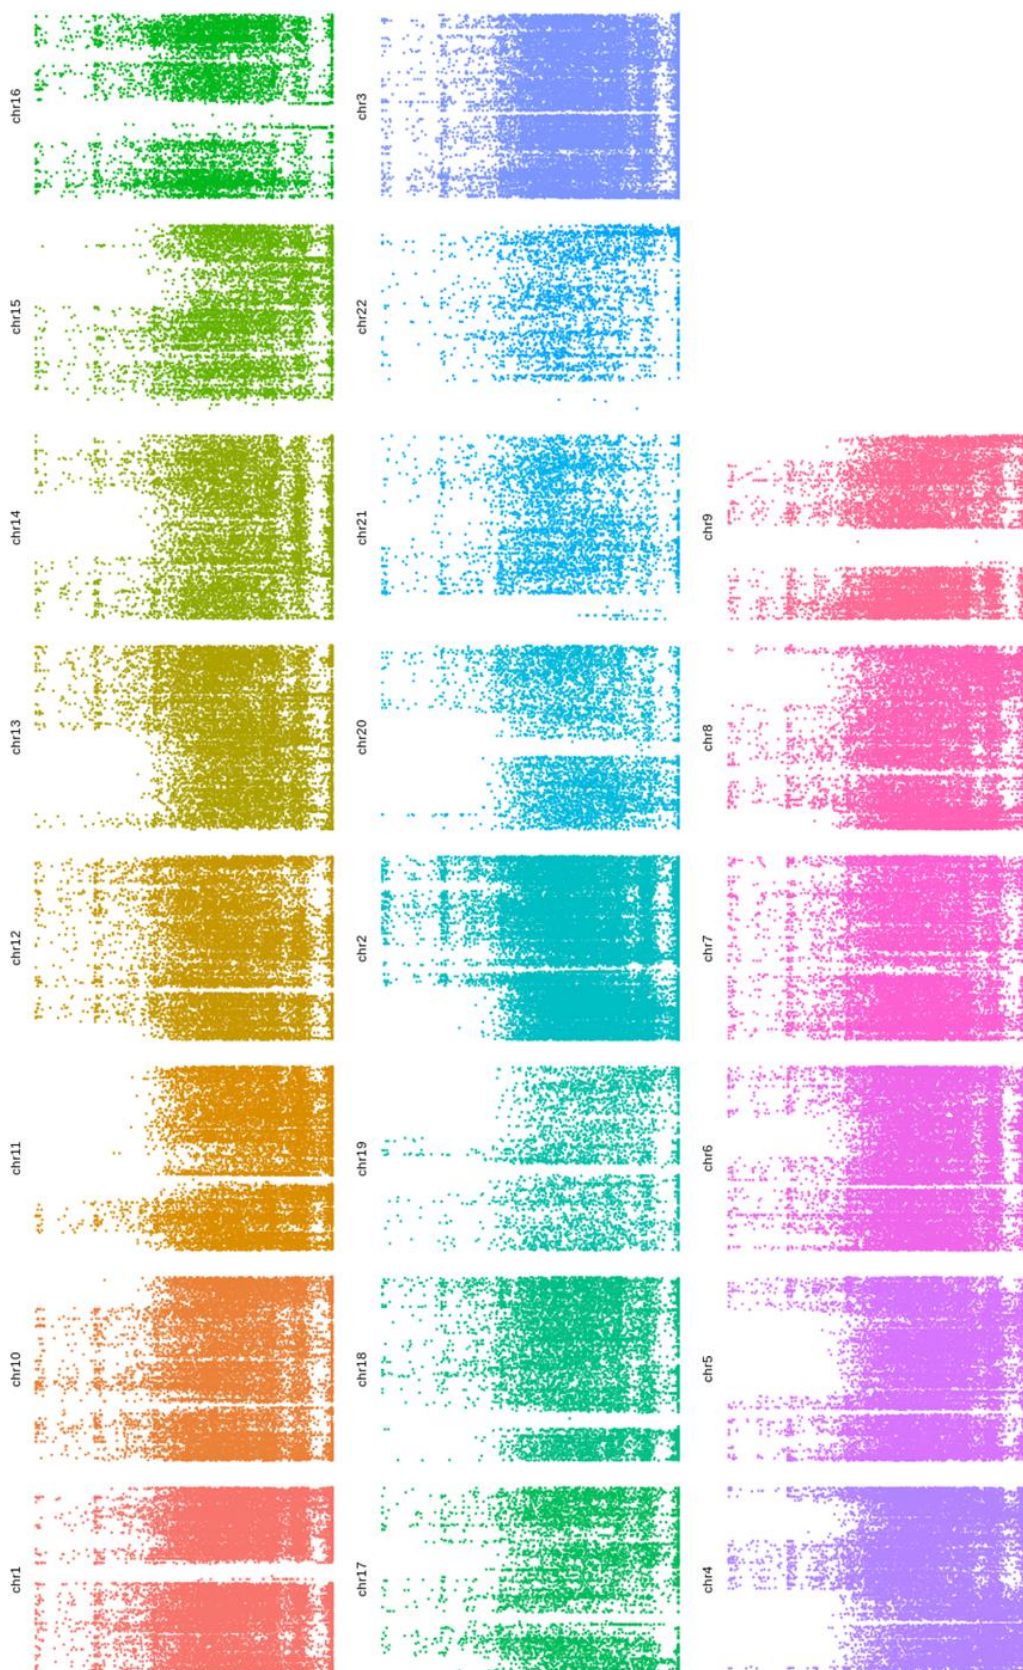

Supplementary figure 3. Complete overview on combined IBD.
