# Supplementary material for: Gollop–Wolfgang Complex Is Associated with a Monoallelic Variation in WNT11
Source: Genes (Basel). 2024 Jan 20;15(1):129. doi: 10.3390/genes15010129 (PMC10815061; doi:10.3390/genes15010129)
Supplement: Supplementary file 1 [file genes-15-00129-s001.zip]

Archive with 7 entries (7 files):
- Supplementary figures.pdf
- Supplementary table 1. Exomiser settings.xlsx
- Supplementary table 2. Primers used for sanger sequencing conformation.xlsx
- Supplementary table 3. Filtered SNVs and small indels detected by the pipeline.xlsx
- Supplementary table 4. Filtered Structural variants detected by the pipeline.xlsx
- Supplementary table 5. Selected metrics of WNT11 mutation.xlsx
- Supplementary table 6. Exomiser top 500 genes variants.xlsx
