# Supplementary material for: Gollop–Wolfgang Complex Is Associated with a Monoallelic Variation in WNT11
Source: Genes (Basel). 2024 Jan 20;15(1):129. doi: 10.3390/genes15010129 (PMC10815061; doi:10.3390/genes15010129)
Supplement: Supplementary file 1 [file genes-15-00129-s001.zip › Supplementary table 1. Exomiser settings.xlsx]

## Sheet: Sheet1
Settings	Values
Analysis type	Exome
Assembly	Hg38
HPO terms	HP:0004058 (Hand monodactyly); HP:0010443 (Bifid femur); HP:0005772 (Aplasia/Hypoplasia of the tibia); HP:0100257 (Ectrodactyly); HP:0006495 (Aplasia/Hypoplasia of the ulna)
Inheritance model	AUTOSOMAL_DOMINANT: 0.1, AUTOSOMAL_RECESSIVE_HOM_ALT: 0.1, AUTOSOMAL_RECESSIVE_COMP_HET: 2.0, X_DOMINANT: 0.1, X_RECESSIVE_HOM_ALT: 0.1, X_RECESSIVE_COMP_HET: 2.0, MITOCHONDRIAL: 0.2 * value represents maximum minor allele frequency in percent (%) permitted for an allele to be considered as a causative candidate under that mode of inheritance.
