# Supplementary material for: Gollop–Wolfgang Complex Is Associated with a Monoallelic Variation in WNT11
Source: Genes (Basel). 2024 Jan 20;15(1):129. doi: 10.3390/genes15010129 (PMC10815061; doi:10.3390/genes15010129)
Supplement: Supplementary file 1 [file genes-15-00129-s001.zip › Supplementary table 2. Primers used for sanger sequencing conformation.xlsx]

## Sheet: Sheet1
Primer name	Primer sequence	Product length (bp)
Reverse	agaagtgccaccccaaagaaa	1094
Forward	gggattccatcgctacaaaa	1094
