# Supplementary material for: Gollop–Wolfgang Complex Is Associated with a Monoallelic Variation in WNT11
Source: Genes (Basel). 2024 Jan 20;15(1):129. doi: 10.3390/genes15010129 (PMC10815061; doi:10.3390/genes15010129)
Supplement: Supplementary file 1 [file genes-15-00129-s001.zip › Supplementary table 4. Filtered Structural variants detected by the pipeline.xlsx]

## Sheet: Arkusz1
Genetic position				Mutation presence*					Annotation
Chrom.	Start	End	TYPE	Father	Paternal Uncle	Mother	Proband	Affected sibling	min. pbrit % score	1000g max AF	1000g event type	Gene	Regulatory element	DGV presence
chr10	126576660	126576834	<INV>	P	P	A	P	P	73.67			C10orf90		gain
chr10	131917022	131919800	<DEL>	P	P	A	P	P	60.4			PPP2R2D		deletion, duplication, gain, gain+loss, loss
chr11	50113866	50147140	<INV>	P	P	A	P	P	100			LOC441601	Promoter/ Enhancer	complex, duplication, gain, gain+loss, inversion
chr11	117206401	117210300	<DUP>	P	P	A	P	P	15.79			PCSK7/ TAGLN	Promoter/ Enhancer	duplication, inversion, loss
chr19	43323701	43331200	<DUP>	P	P	A	P	P	100	0.008/ 0.0189/ 0.005	<CN0>/ <CN2>/ DEL			deletion, duplication ,gain, gain+loss, insertion, loss
chr2	106262892	106270000	<DEL>	P	P	A	P	P	100	0.4147/ 0.001	<CN0>/ <CN2>			deletion, gain, gain+loss, loss
chr5	96559330	97236319	<INV>	P	P	A	P	P	16.93	0.001/ 0.6944/ 0.0197/ 0.0014/ 0.0327/ 0.0079/ 0.0375/ 0.001	LINE1/ DEL_ALU/ ALU/ ALU/ ALU/ ALU/ ALU/ LINE1	CAST/ ERAP1/ ERAP2/ LIX1/ LNPEP/ LOC101929710/ RIOK2	Promoter/ Enhancer	gain, loss
chr6	12431794	12432451	<INV>	P	P	A	P	P	100					inversion
chr8	133866561	134670857	<DUP>	P	P	A	P	P	51.81	0.2117	LINE1	LOC101927822/ ZFAT/ ZFAT-AS1	Promoter/ Enhancer	deletion,gain
														* - whether specific mutation was present or absent in the sample.
