# Supplementary material for: Gollop–Wolfgang Complex Is Associated with a Monoallelic Variation in WNT11
Source: Genes (Basel). 2024 Jan 20;15(1):129. doi: 10.3390/genes15010129 (PMC10815061; doi:10.3390/genes15010129)
Supplement: Supplementary file 1 [file genes-15-00129-s001.zip › Supplementary table 5. Selected metrics of WNT11 mutation.xlsx]

## Sheet: Sheet1
Metric	Score	Description
DANN	0.9988
MutationTaster	0.8103	Disease causing
GERP	4.63
MutationAssessor	3.1199	Medium
SIFT	0	Damaging
CADD v1.6 C>T	26.1
REVEL C>T	0.68
